# Supplementary material for: Supramolecular assemblies involving anion–π and lone pair–π interactions: experimental observation and theoretical analysis
Source: Royal Society of Chemistry journal article supplement (doi:10.1039/c0ce00593b), 2011-01-01

**Supporting Information**  
**to the paper entitled**

**Supramolecular Assemblies Involving Anion- $\pi$  and Lone Pair- $\pi$   
Interactions: Experimental Observation and Theoretical Analysis**

Amrita Das,<sup>a</sup> Somnath Ray Choudhury,<sup>b</sup> Carolina Estarellas,<sup>c</sup> Biswajit Dey,<sup>d</sup> Antonio Frontera,<sup>\*c</sup> Joanna Hemming,<sup>e</sup> Madeleine Helliwell,<sup>e</sup> Patrick Gamez,<sup>\*f</sup> and Subrata Mukhopadhyay<sup>\*a</sup>

**Table of Contents**

---

|                                                                                                                                   |         |
|-----------------------------------------------------------------------------------------------------------------------------------|---------|
| <b>Table S1.</b> Crystal data and structure refinement for compounds <b>1</b> and <b>2</b> .                                      | Page S2 |
| <b>Table S2.</b> Selected bond lengths (Å) and angles (deg) for <b>1</b> .                                                        | S3      |
| <b>Table S3.</b> Selected bond lengths (Å) and angles (deg) for <b>2</b> .                                                        | S3      |
| <b>Figure S1.</b> Schematic representation of the reaction pathways used to determine the dimerization energies $E_1$ and $E_2$ . | S4      |
| <b>Figure S2.</b> Schematic representation of the reaction pathways used to determine the dimerization energies $E_3$ and $E_4$ . | S5      |
| <b>Figure S3.</b> TG plots of compounds <b>1</b> and <b>2</b> .                                                                   | S6      |

---

**Table S1.** Crystal data and structure refinement for compounds **1** and **2**.

| Compound                                              | <b>1</b>                                                                          | <b>2</b>                                                                                         |
|-------------------------------------------------------|-----------------------------------------------------------------------------------|--------------------------------------------------------------------------------------------------|
| Formula                                               | C <sub>26</sub> H <sub>36</sub> N <sub>8</sub> O <sub>18</sub> Cl <sub>2</sub> Ni | C <sub>26</sub> H <sub>36</sub> N <sub>8</sub> O <sub>10</sub> P <sub>2</sub> F <sub>12</sub> Ni |
| Mw (g mol <sup>-1</sup> )                             | 878.22                                                                            | 969.28                                                                                           |
| Crystal system                                        | Triclinic                                                                         | Triclinic                                                                                        |
| Space group                                           | <i>P</i> $\bar{1}$ (No. 2)                                                        | <i>P</i> $\bar{1}$ (No. 2)                                                                       |
| <i>a</i> / Å                                          | 7.0471(12)                                                                        | 7.0459(10)                                                                                       |
| <i>b</i> / Å                                          | 11.314(2)                                                                         | 11.8570(17)                                                                                      |
| <i>c</i> / Å                                          | 11.747(2)                                                                         | 11.8501(17)                                                                                      |
| $\alpha$                                              | 86.321(3)°                                                                        | 84.482(2)°                                                                                       |
| $\beta$                                               | 83.933(3)°                                                                        | 84.484(2)°                                                                                       |
| $\gamma$                                              | 72.684(3)°                                                                        | 72.251(2)°                                                                                       |
| <i>F</i> (000)                                        | 454                                                                               | 494                                                                                              |
| <i>V</i> / Å <sup>3</sup>                             | 888.6(3)                                                                          | 936.2(2)                                                                                         |
| <i>Z</i>                                              | 1                                                                                 | 1                                                                                                |
| <i>T</i> / <i>K</i>                                   | 100                                                                               | 100                                                                                              |
| Theta min-max [°]                                     | 1.9 to 26.4                                                                       | 2.4 to 26.4                                                                                      |
| $\lambda$ (Mo <i>K</i> $\alpha$ )/ Å                  | 0.71073                                                                           | 0.71073                                                                                          |
| $\mu$ (Mo <i>K</i> $\alpha$ )/ mm <sup>-1</sup>       | 0.787                                                                             | 0.728                                                                                            |
| Crystal Size [mm <sup>3</sup> ]                       | 0.40 × 0.45 × 0.50                                                                | 0.20 × 0.45 × 0.50                                                                               |
| <i>R</i> 1, <i>I</i> > 2 $\sigma$ ( <i>I</i> ) (all)  | 0.0340                                                                            | 0.0292                                                                                           |
| <i>wR</i> 2, <i>I</i> > 2 $\sigma$ ( <i>I</i> ) (all) | 0.0791                                                                            | 0.0783                                                                                           |
| <i>S</i> (GOF)                                        | 0.97                                                                              | 1.04                                                                                             |
| Total reflections                                     | 7093                                                                              | 7510                                                                                             |
| Independent reflections ( <i>R</i> <sub>int</sub> )   | 3571 (0.049)                                                                      | 3768 (0.014)                                                                                     |
| Observed data [ <i>I</i> > 2 $\sigma$ ( <i>I</i> )]   | 2921                                                                              | 3573                                                                                             |
| Min. and max. resd. dens. [e/ Å <sup>3</sup> ]        | -0.38, 0.56                                                                       | -0.36, 0.51                                                                                      |

**Table S2.** Selected bond lengths (Å) and angles (deg) for **1**.

|                              |            |                 |            |
|------------------------------|------------|-----------------|------------|
| Ni(1)–O(1)                   | 2.0137(15) | O(4)–C(3)       | 1.283(3)   |
| Ni(1)–O(4)                   | 2.0051(15) | O(3)–C(3)       | 1.232(2)   |
| Ni(1)–O(5)                   | 2.0949(18) | C(1)–C(2)       | 1.513(3)   |
| O(1)–C(1)                    | 1.275(3)   | C(2)–C(3)       | 1.522(3)   |
| O(2)–C(1)                    | 1.247(3)   |                 |            |
| O(1)–Ni(1)–O(4)              | 90.81(6)   | Ni(1)–O(4)–C(3) | 128.39(13) |
| O(1)–Ni(1)–O(5)              | 94.38(7)   | O(4)–C(3)–O(3)  | 123.10(19) |
| O(1)–Ni(1)–O(4) <sup>#</sup> | 89.19(6)   | C(1)–C(2)–C(3)  | 120.11(18) |
| O(1)–Ni(1)–O(5) <sup>#</sup> | 85.62(7)   | O(1)–C(1)–O(2)  | 122.22(19) |
| O(4)–Ni(1)–O(5)              | 91.96(6)   | O(4)–C(3)–C(2)  | 119.38(18) |
| O(4)–Ni(1)–O(5) <sup>#</sup> | 88.05(6)   | O(1)–C(1)–C(2)  | 119.05(19) |
| Ni(1)–O(1)–C(1)              | 127.11(13) | O(4)–C(3)–C(2)  | 119.38(18) |

Symmetry code: # = 2–x, 1–y, 2–z

**Table S3.** Selected bond lengths (Å) and angles (deg) for **2**

|                              |            |                 |            |
|------------------------------|------------|-----------------|------------|
| Ni(1)–O(1)                   | 2.0218(12) | O(4)–C(3)       | 1.2841(19) |
| Ni(1)–O(4)                   | 1.9971(11) | O(3)–C(3)       | 1.2344(19) |
| Ni(1)–O(5)                   | 2.0878(14) | C(1)–C(2)       | 1.520(2)   |
| O(1)–C(1)                    | 1.2704(19) | C(2)–C(3)       | 1.525(2)   |
| O(2)–C(1)                    | 1.253(2)   |                 |            |
| O(1)–Ni(1)–O(4)              | 91.10(5)   | Ni(1)–O(4)–C(3) | 129.30(10) |
| O(1)–Ni(1)–O(5)              | 94.56(5)   | O(4)–C(3)–O(3)  | 123.00(15) |
| O(1)–Ni(1)–O(4) <sup>#</sup> | 88.90(5)   | C(1)–C(2)–C(3)  | 120.20(14) |
| O(1)–Ni(1)–O(5) <sup>#</sup> | 85.44(5)   | O(1)–C(1)–O(2)  | 122.02(14) |
| O(4)–Ni(1)–O(5)              | 92.03(5)   | O(4)–C(3)–C(2)  | 120.08(13) |
| O(4)–Ni(1)–O(5) <sup>#</sup> | 87.97(5)   | O(1)–C(1)–C(2)  | 120.05(13) |
| Ni(1)–O(1)–C(1)              | 127.52(10) | O(4)–C(3)–C(2)  | 120.08(13) |

Symmetry code: # = 2–x, 1–y, 2–z

**Figure S1.** Schematic representation of the reaction pathways used to determine the dimerization energies  $E_1$  and  $E_2$  for monomers A) **M5** and B) **M6**. The two noncovalent forces (H-bonding and lp- $\pi$  interactions) responsible for the formation of the dimers **D5** and **D6** are indicated.

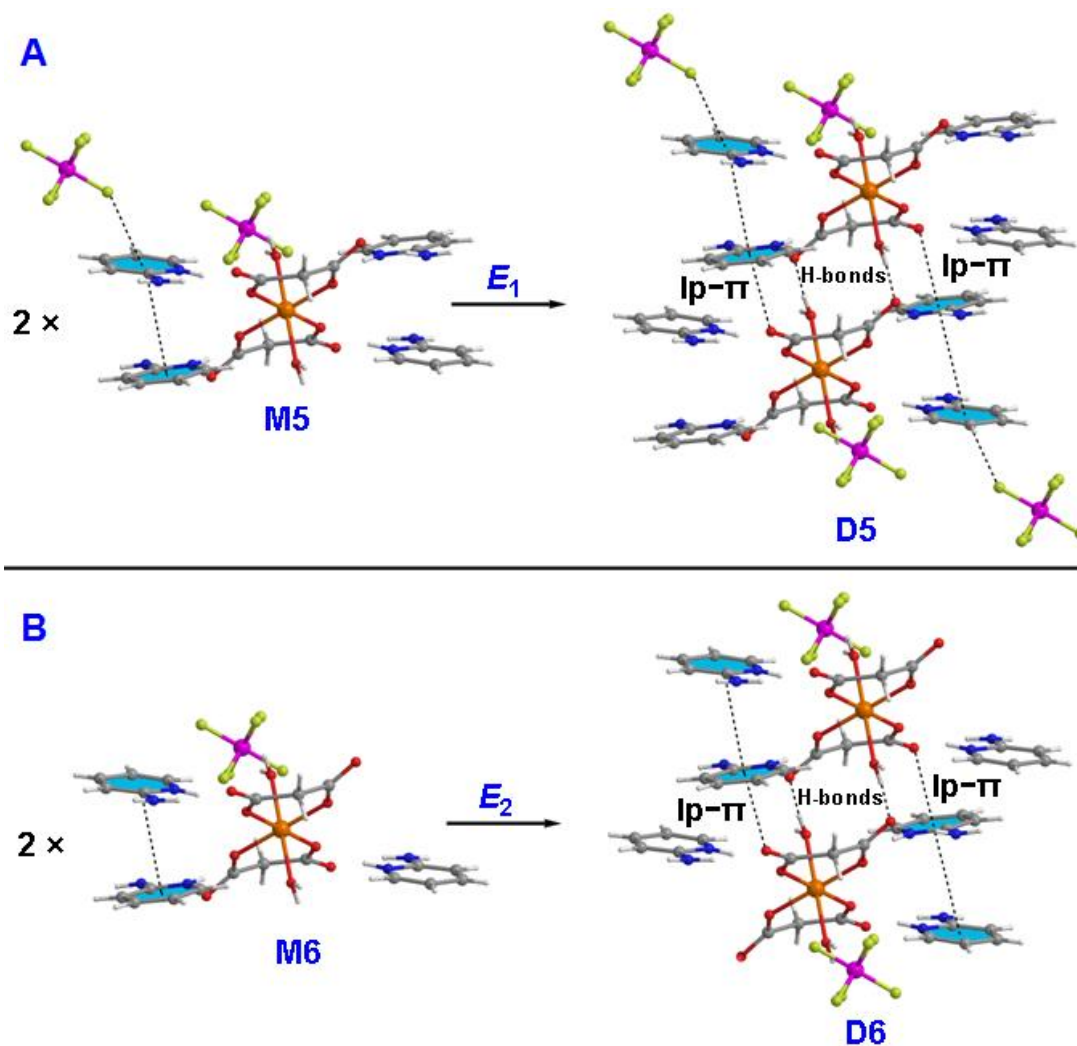

**Figure S2.** Schematic representation of the reaction used to determine the dimerization energies  $E_3$  and  $E_4$  for monomers A) **M7** and B) **M8**. The two noncovalent forces (H-bonding and lp- $\pi$  interactions) responsible for the formation of the dimers **D7** and **D8** are indicated.

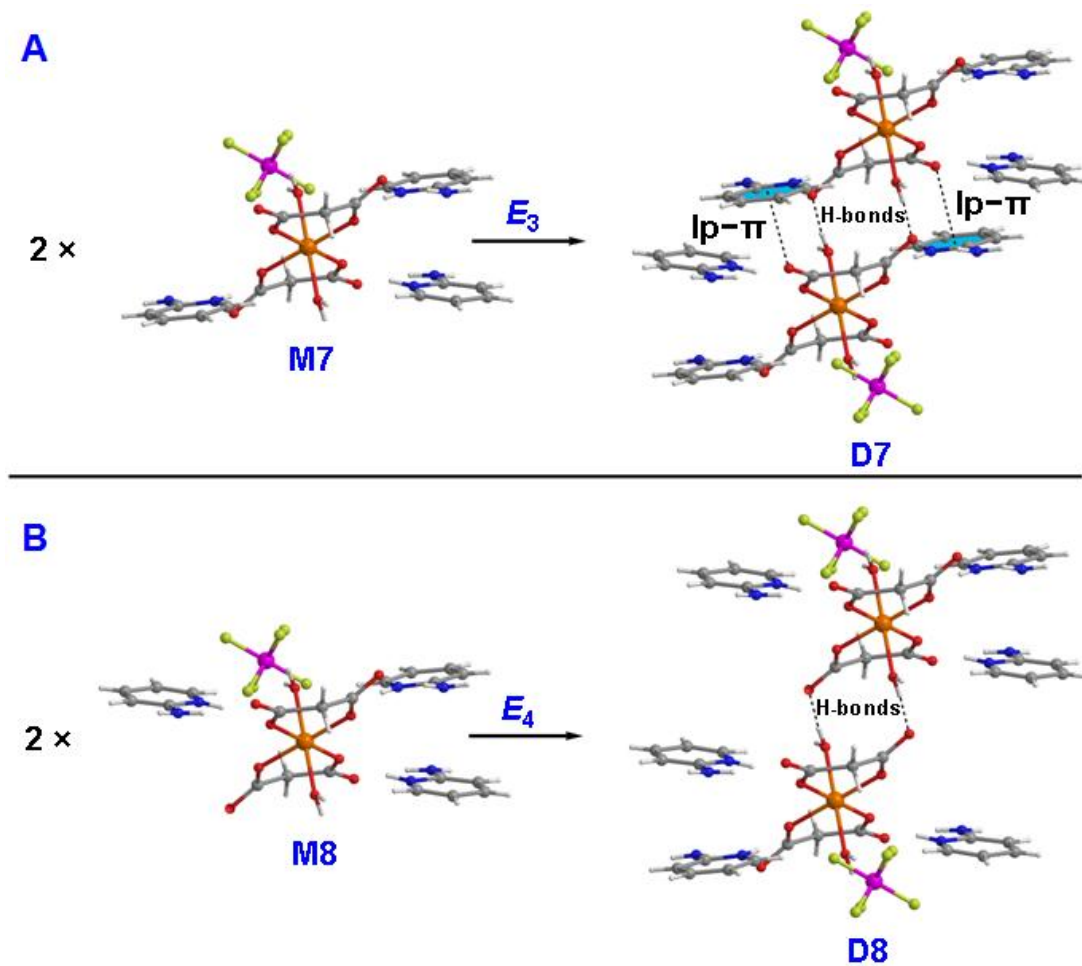

Figure S3. TG plots of compounds 1 and 2.

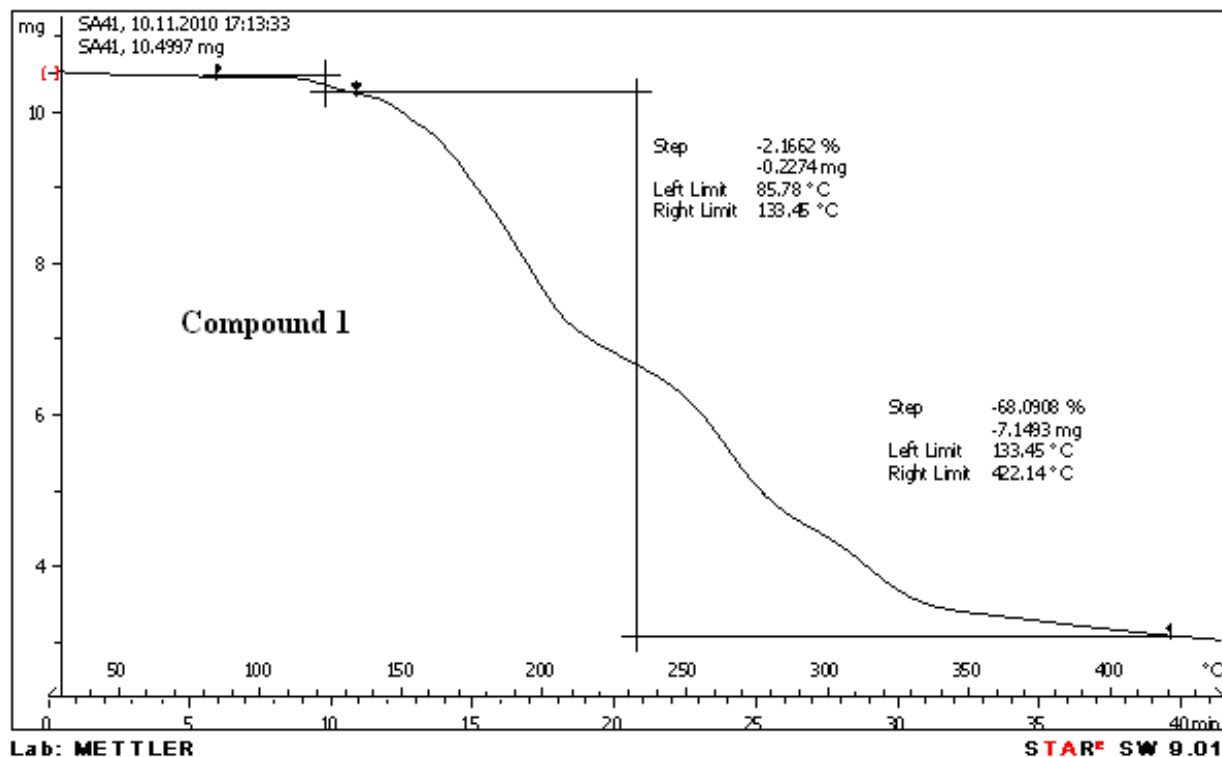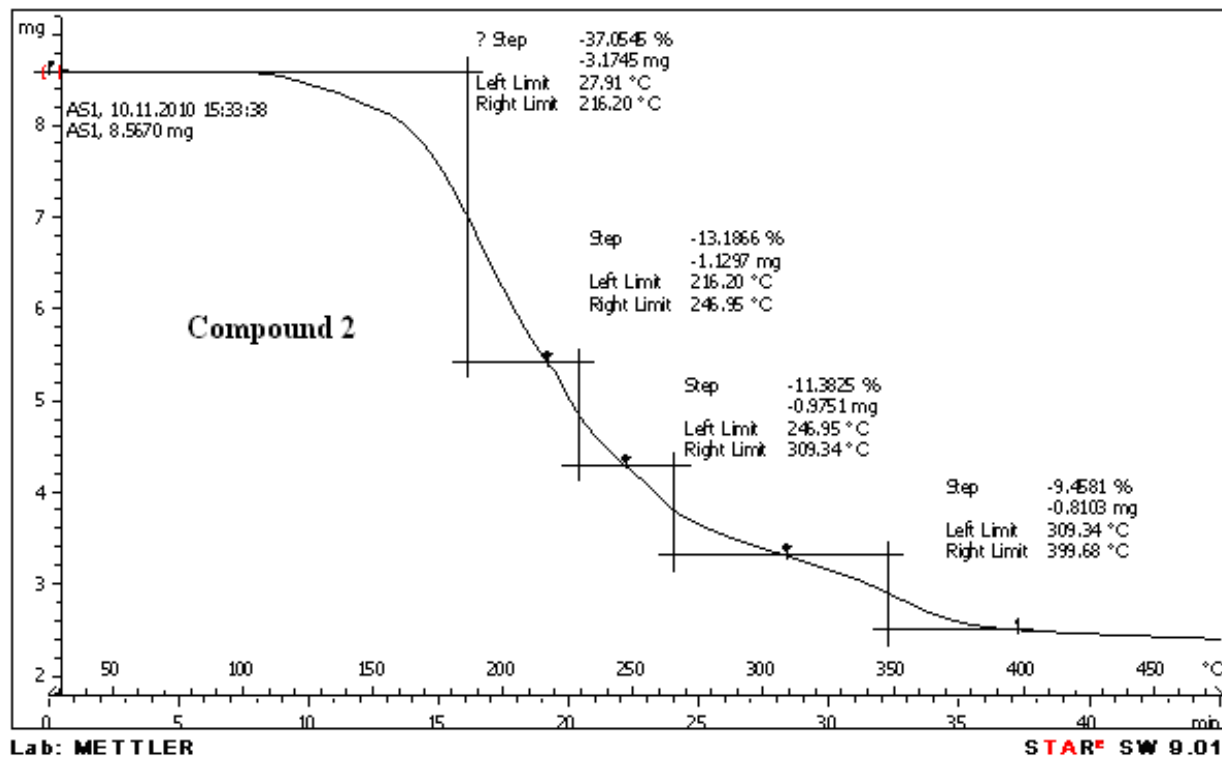

Supplement: c0ce00593b.pdf [file c0ce00593b.pdf]
